# Supplementary material for: Development and Validation for Quantitative Determination of Genotoxic Impurity in Gemfibrozil by Gas Chromatography with Mass Spectrometry
Source: MDPI journal article supplement (doi:10.3390/separations10030145), 2023-02-21
Supplement: s1 [file s1]

Supplementary Materials

# Development and Validation for Quantitative Determination of Genotoxic Impurity in Gemfibrozil by Gas Chromatography with Mass Spectrometry

Hari Naga Prasada Reddy Chittireddy <sup>1</sup>, J. V. Shanmukha Kumar <sup>1,\*</sup>, Anuradha Bhimireddy <sup>1</sup>, Mohammed Rafi Shaik <sup>2,\*</sup>, Mohammad Rafe Hatshan <sup>2</sup>, Mujeeb Khan <sup>2</sup>, Abdulrahman Alwarthan <sup>2</sup> and Baji Shaik <sup>3</sup>

<sup>1</sup> Department of Engineering Chemistry, College of Engineering, Koneru Lakshmaiah Education Foundation, Vaddeswaram, Guntur 522 502, Andhra Pradesh, India

<sup>2</sup> Department of Chemistry, College of Science, King Saud University, Riyadh 11451, Saudi Arabia

<sup>3</sup> School of Chemical Engineering, Yeungnam University, Gyeongsan 38541, Republic of Korea

\* Correspondence: shanmukh\_fed@kluniversity.in (J.V.S.K.); mrshaik@ksu.edu.sa (M.R.S.); Tel.: +966-11-4670439 (M.R.S.)

## 1. Allyl chloride standard Qualification data:

|                                                                                      |                                                                                      |                                                                                     |
|--------------------------------------------------------------------------------------|--------------------------------------------------------------------------------------|-------------------------------------------------------------------------------------|
| <b>Product Name</b> : ALLYL CHLORIDE                                                 |                                                                                      |                                                                                     |
| <b>Chemical Name</b> : 3-Chloro-1-propene 2-Propenyl chloride                        |                                                                                      |                                                                                     |
| <b>Synonyms</b> : NA                                                                 |                                                                                      |                                                                                     |
| <b>CAT No.</b> : OT1610000                                                           |                                                                                      |                                                                                     |
| <b>CAS No.</b> : 107-05-1                                                            |                                                                                      |                                                                                     |
| <b>Molecular Formula</b> : C <sub>3</sub> H <sub>5</sub> Cl                          |                                                                                      |                                                                                     |
| <b>Molecular Weight</b> : 76.52 g/mol                                                |                                                                                      |                                                                                     |
| <b>Storage Condition</b> : Store at 2°C to 8°C                                       |                                                                                      |                                                                                     |
| <b>Shipping condition</b> : Ambient                                                  |                                                                                      |                                                                                     |
| 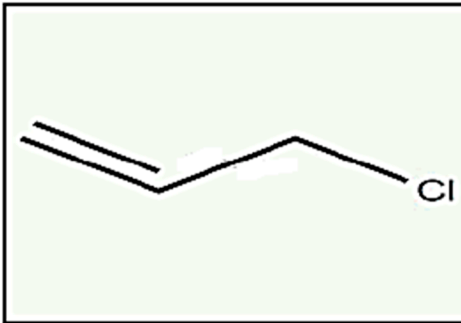 |                                                                                      |                                                                                     |
| <b>ANALYTICAL INFORMATION:</b>                                                       |                                                                                      |                                                                                     |
| <b>Sr No</b>                                                                         | <b>TESTS</b>                                                                         | <b>RESULTS</b>                                                                      |
| 1                                                                                    | DESCRIPTION                                                                          | Colourless Liquid                                                                   |
| 2                                                                                    | IDENTIFICATION<br>1. 1H-NMR<br>2. MASS<br>3. IR                                      | Conforms to the structure<br>Conforms to the structure<br>Conforms to the structure |
| 3                                                                                    | CHROMATOGRAPHIC PURITY<br>(By GC, area Normalization)                                | 99.23 %                                                                             |
| 4                                                                                    | Solvent content by NMR                                                               | NIL                                                                                 |
| 5                                                                                    | DEFINED POTENCY<br>(By Mass Balance Method)[(100 - Solvent Content) x GC Purity/100] | 99.23 %                                                                             |

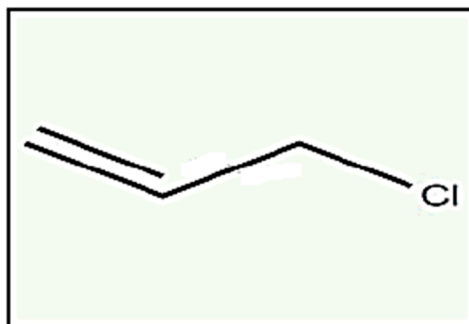

Figure S1. Allyl chloride standard certificate of analysis.

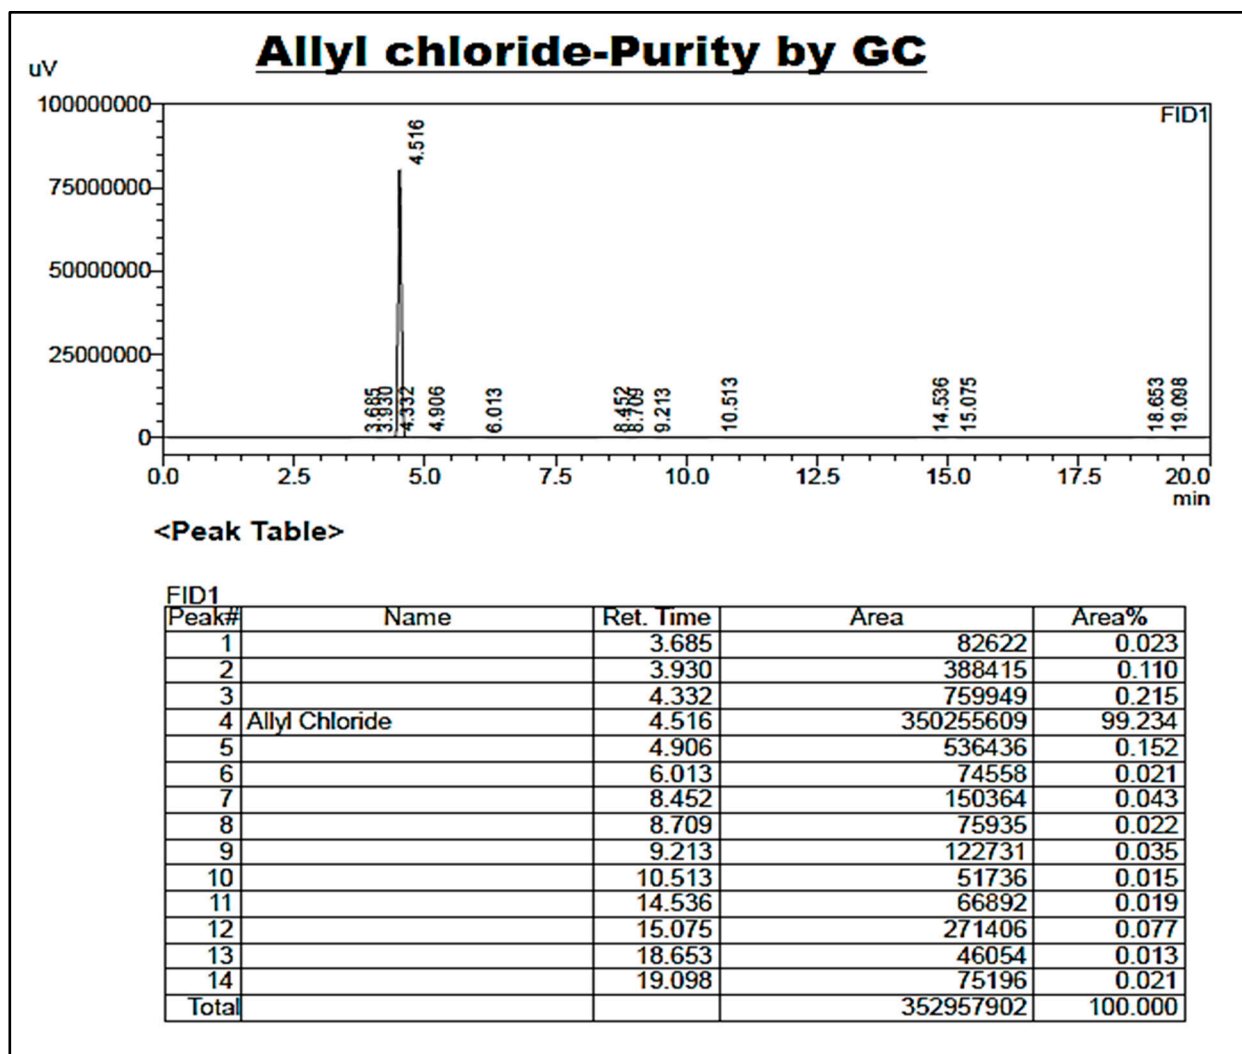

Figure S2. Allyl chloride standard purity by GC analysis.

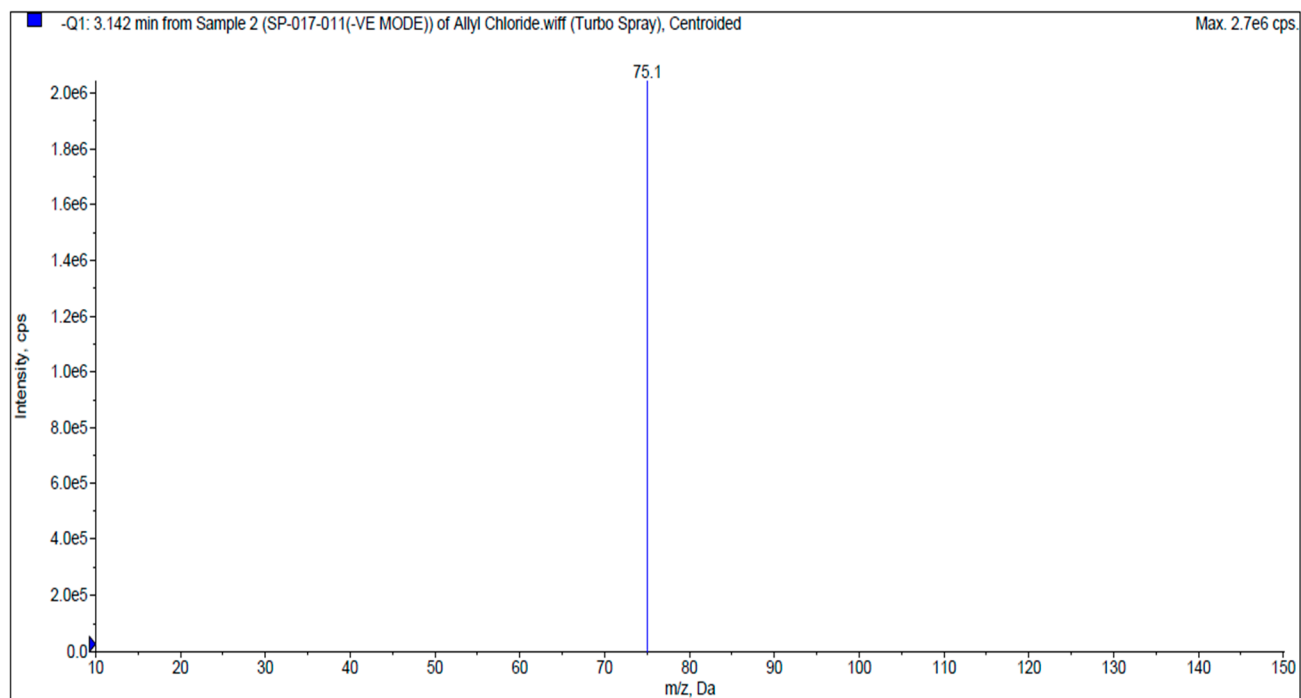

Figure S3. Allyl chloride standard Mass data.

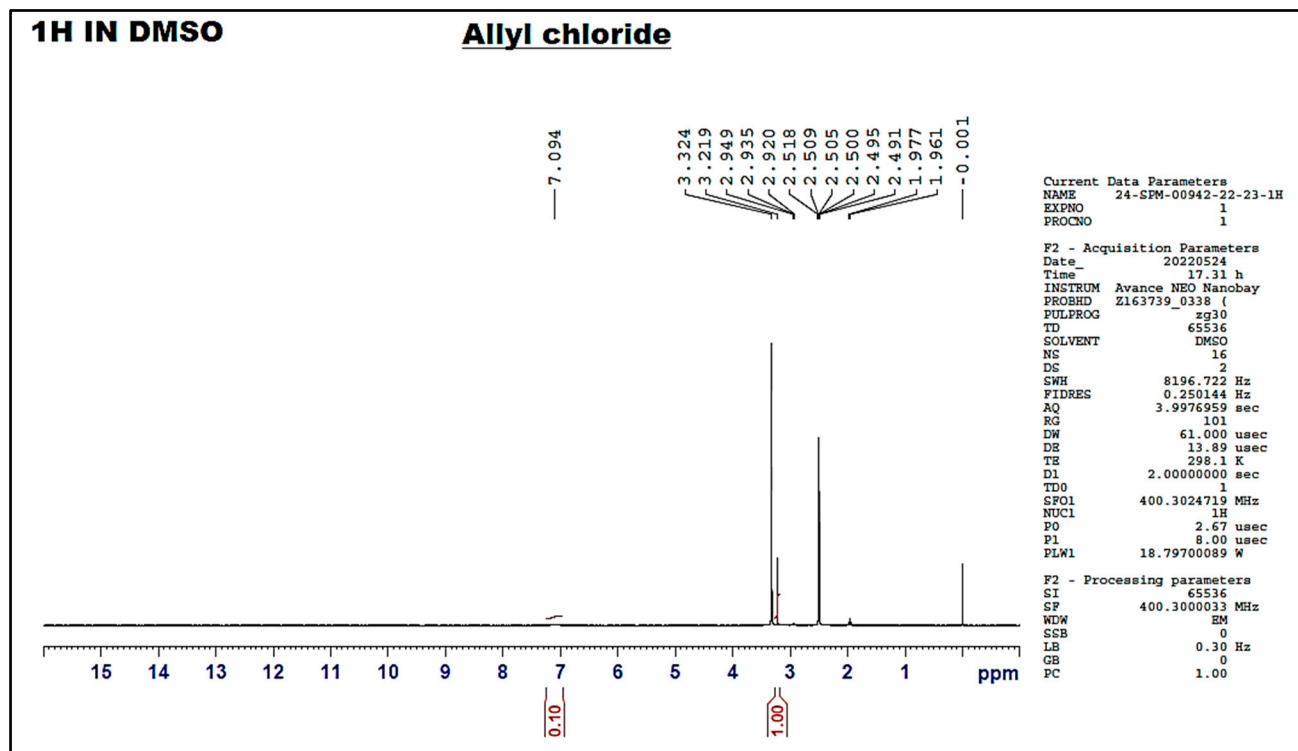

Figure S4. Allyl chloride standard <sup>1</sup>H-NMR data-1.

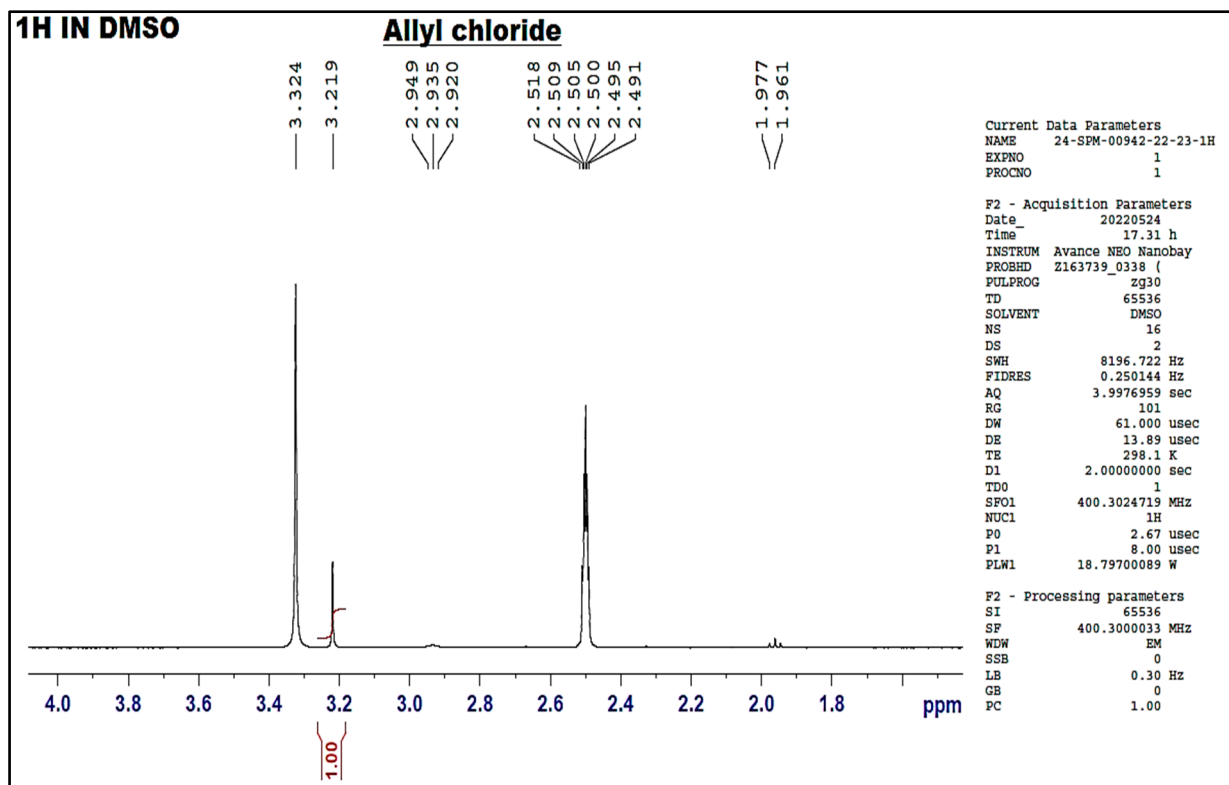

Figure S5. Allyl chloride standard 1H-NMR data-2.

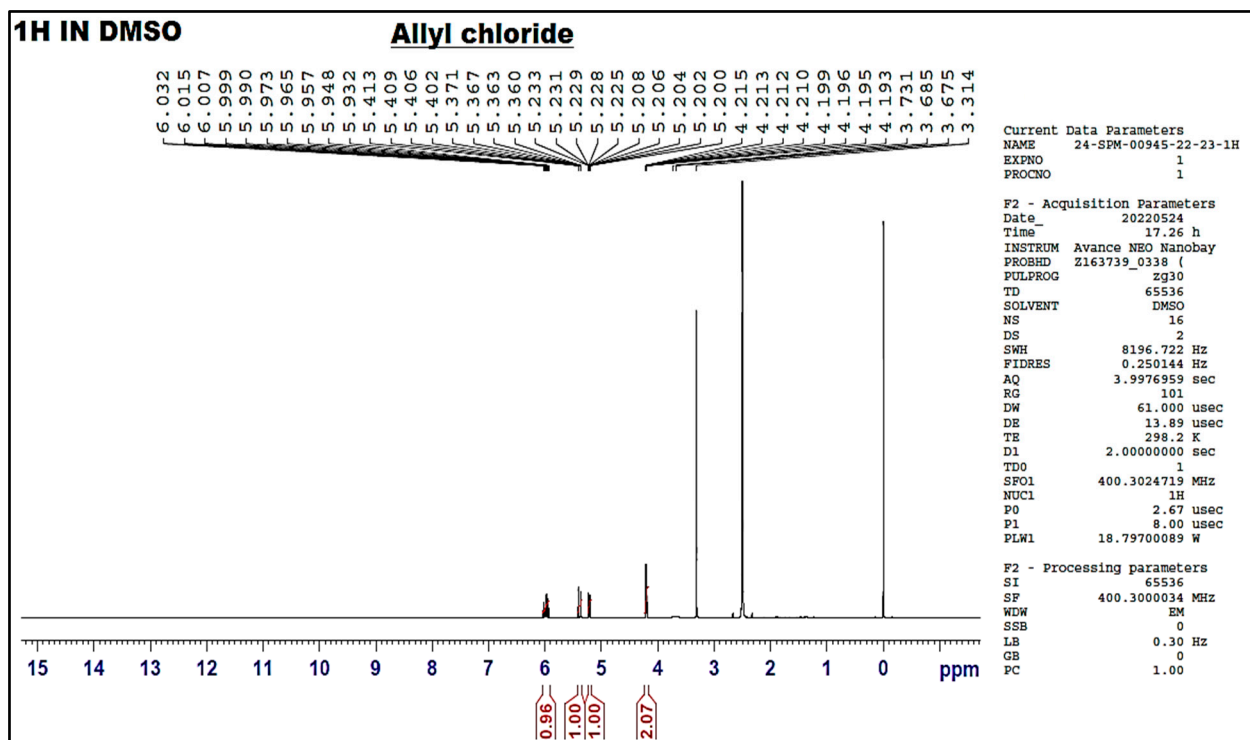

Figure S6. Allyl chloride standard 1H-NMR data-3.

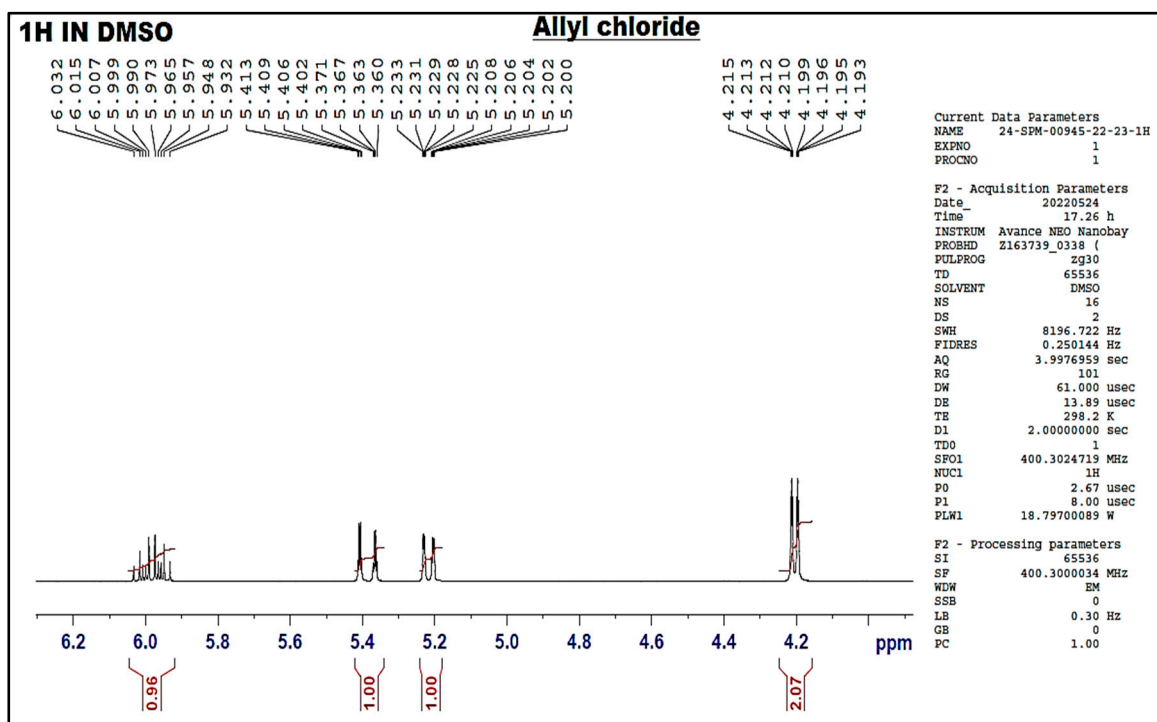

Figure S7. Allyl chloride standard <sup>1</sup>H-NMR data-4.

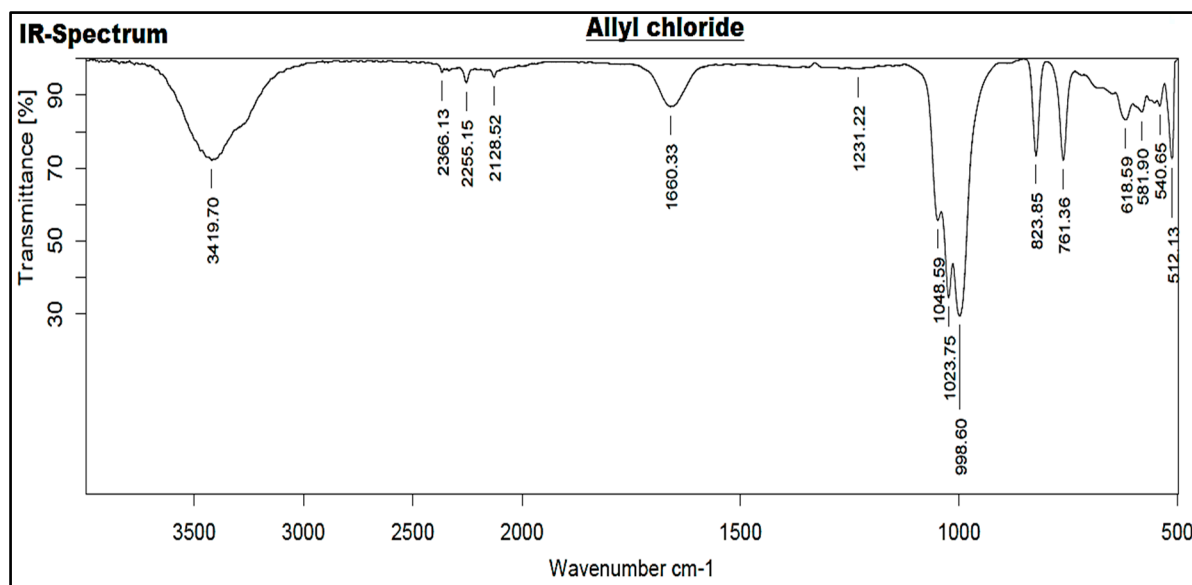

Figure S8. Allyl chloride standard IR-Spectrum.

**Validation parameters:**

**1. System suitability and Specificity chromatograms:**

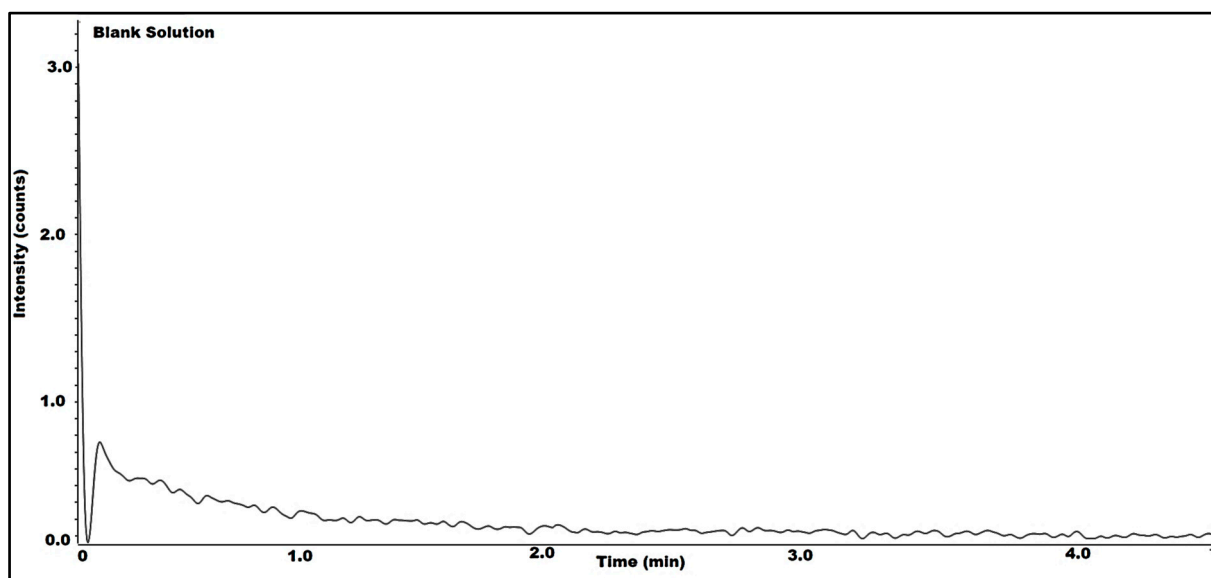

**Figure S9.** MS/MS chromatogram of Blank solution.

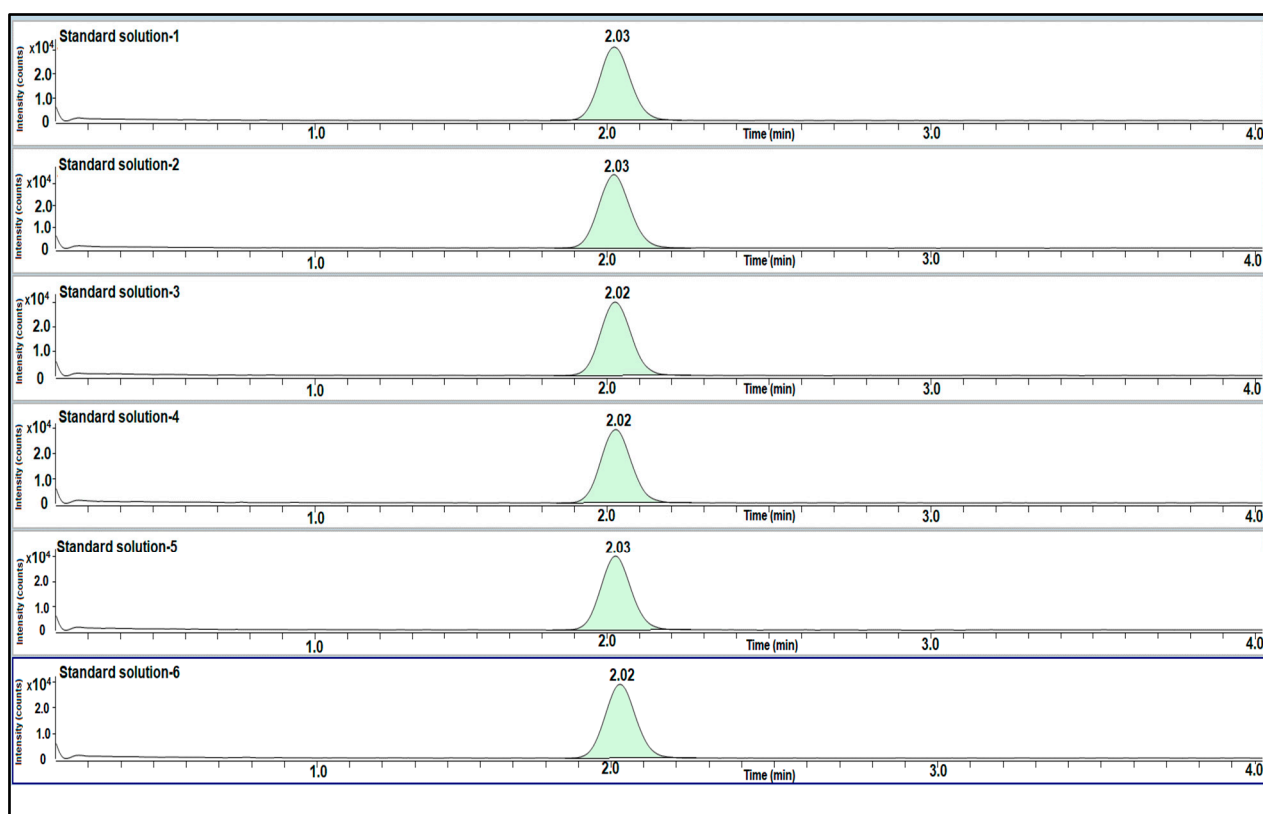

**Figure S10.** MS/MS chromatogram of System suitability standard solution.

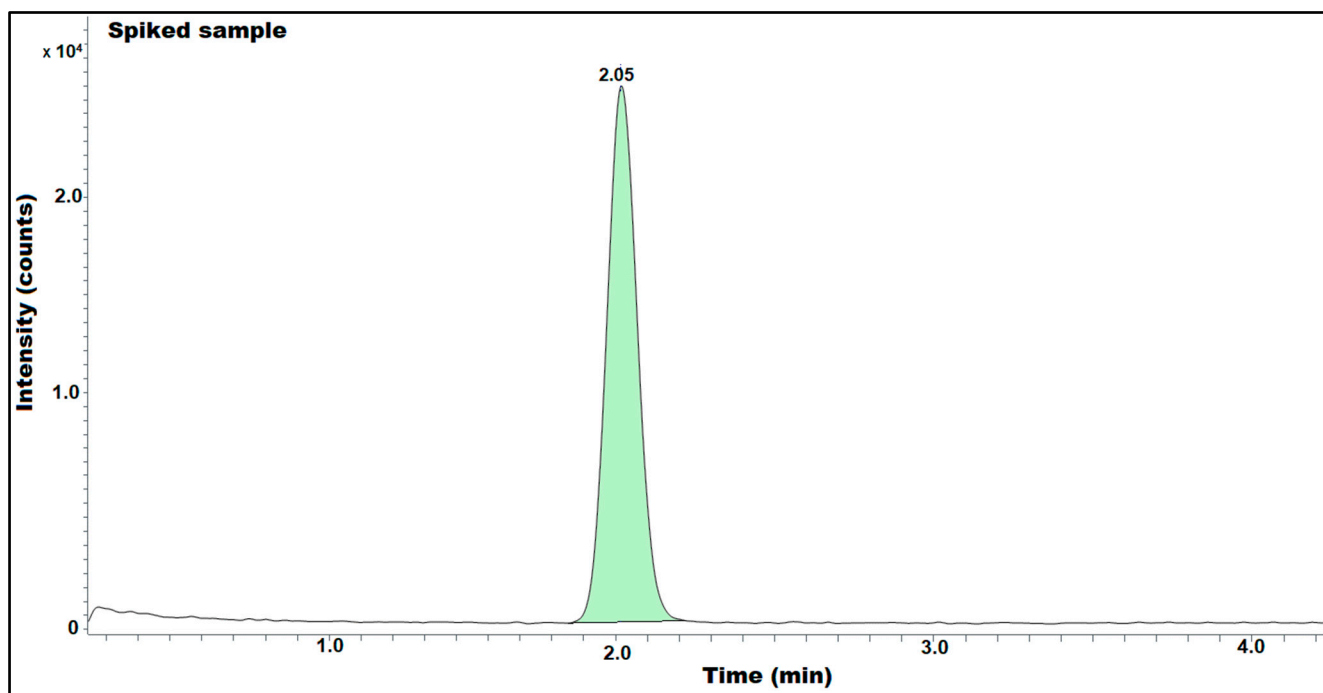

Figure S11. MS/MS chromatogram of spiked sample solution.

## 2. Method precision

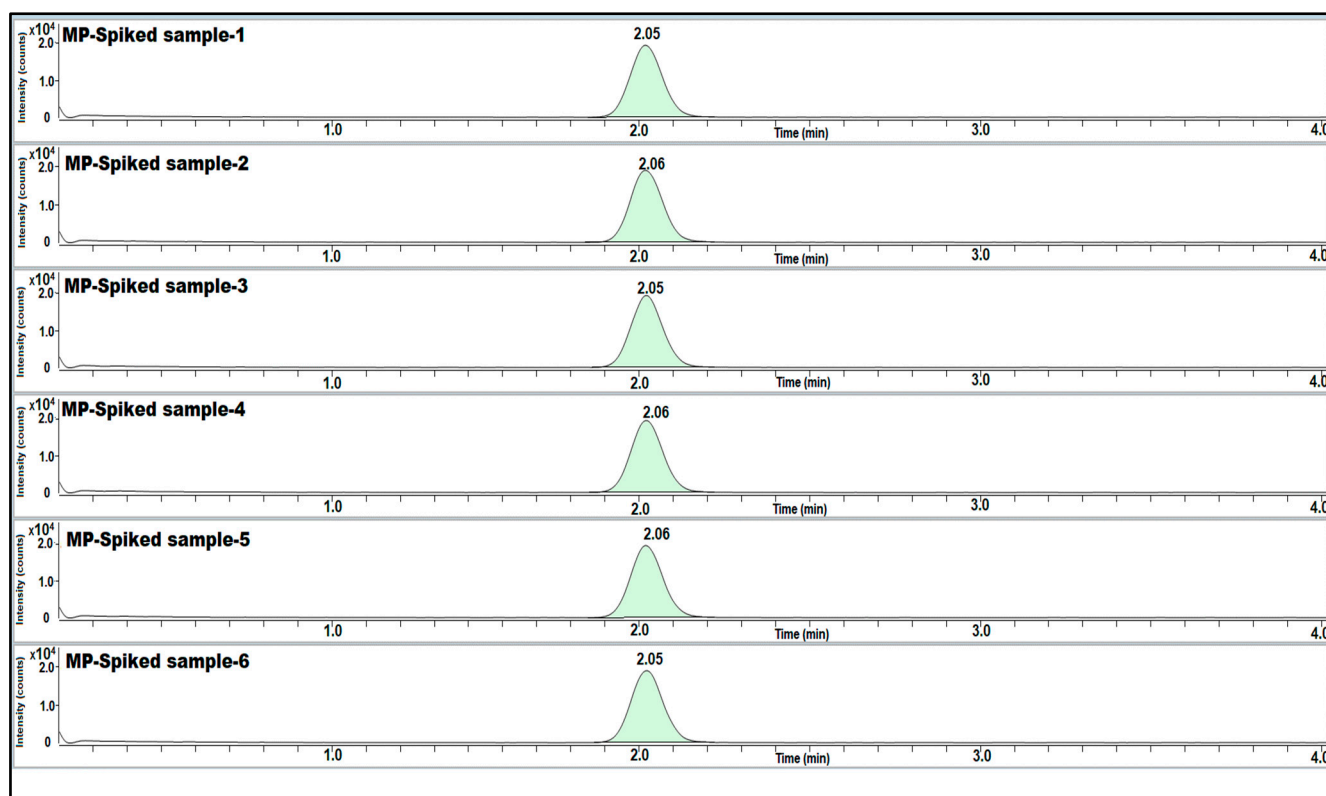

Figure S12. MS/MS chromatograms of Method precision.

### 3. Intermediate precision

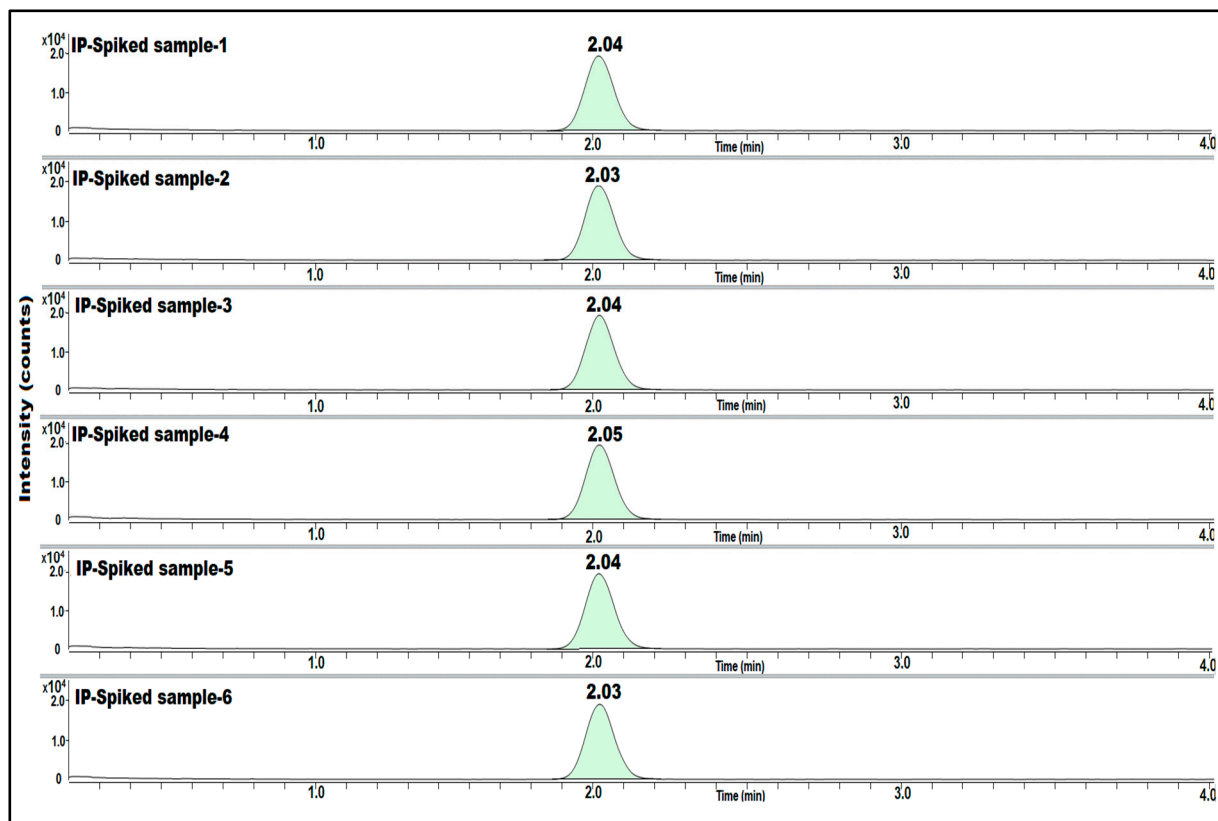

Figure S13. MS/MS chromatograms of Intermediate precision.

### 4. Accuracy

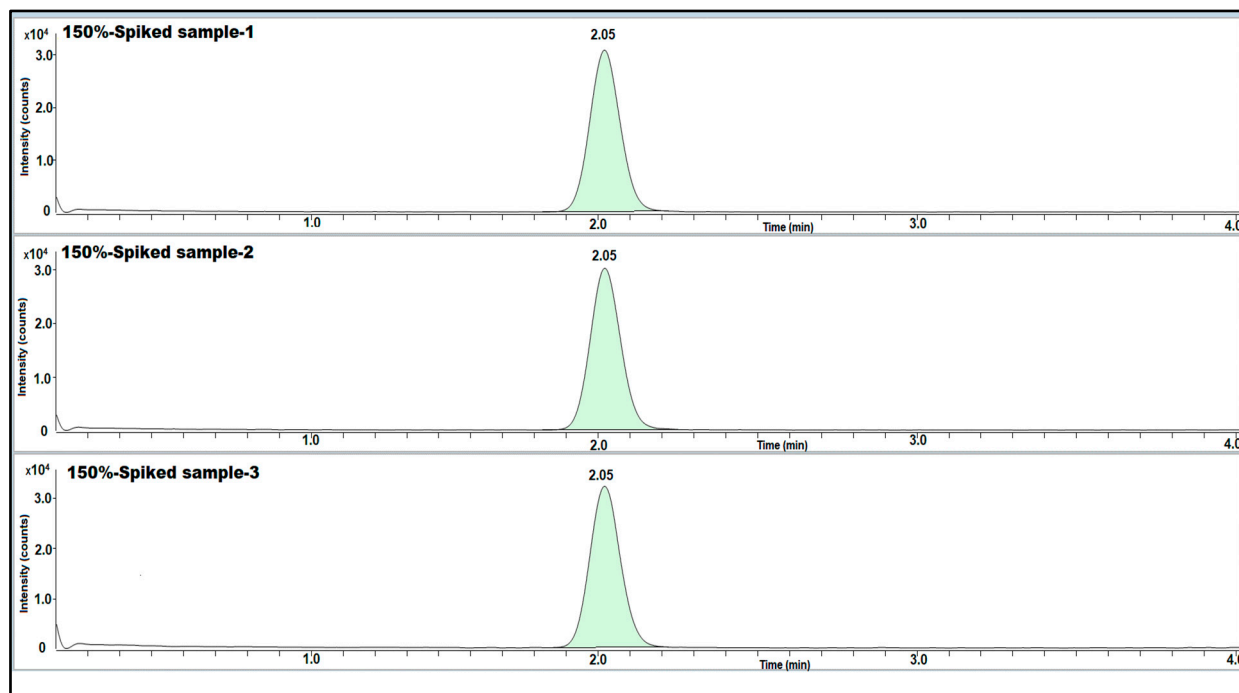

Figure S14. MS/MS chromatograms of 150% Accuracy.



## 5. Solution Stability

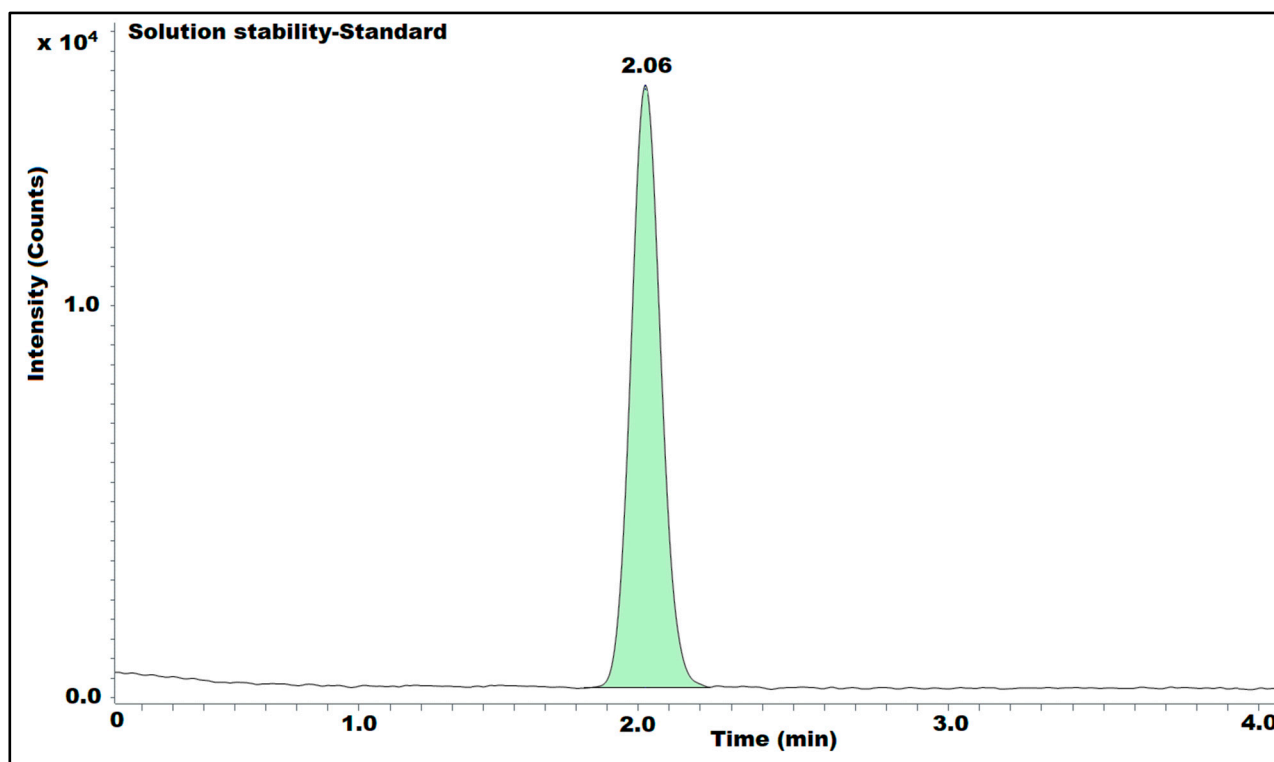

Figure 15: MS/MS chromatograms of Solution stability standard.

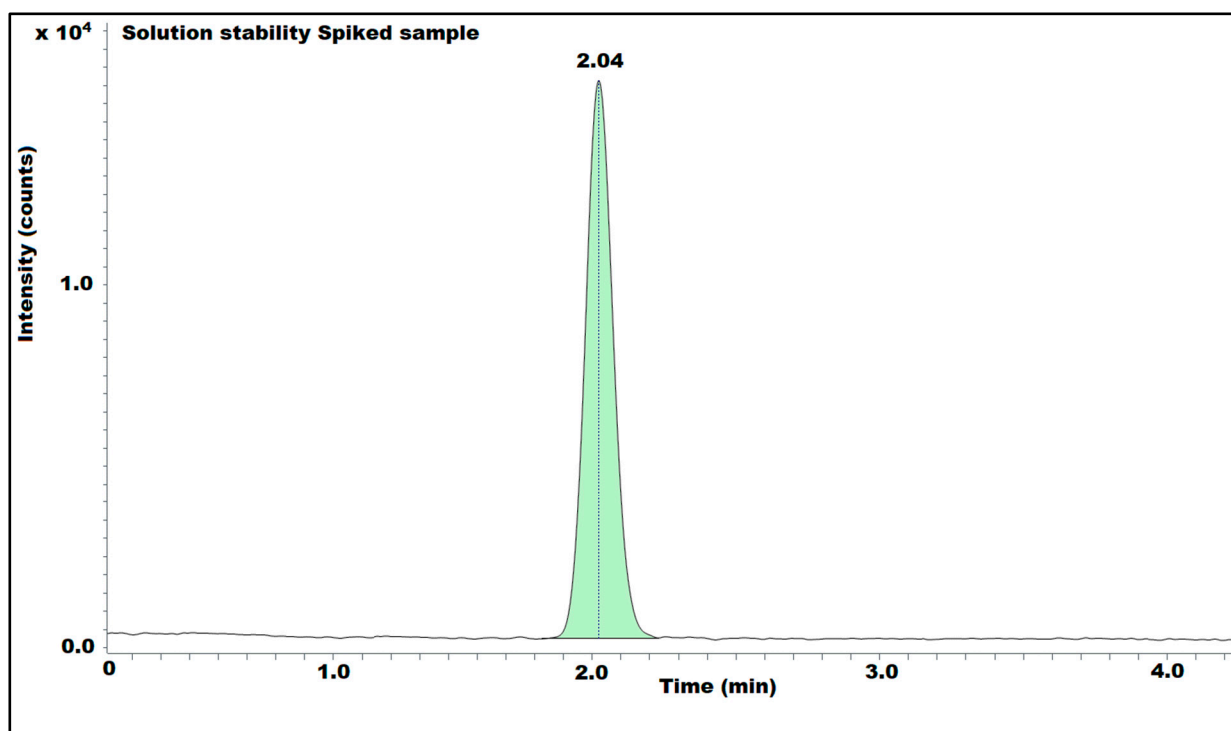

Figure S16. MS/MS chromatograms of Solution stability spiked sample.

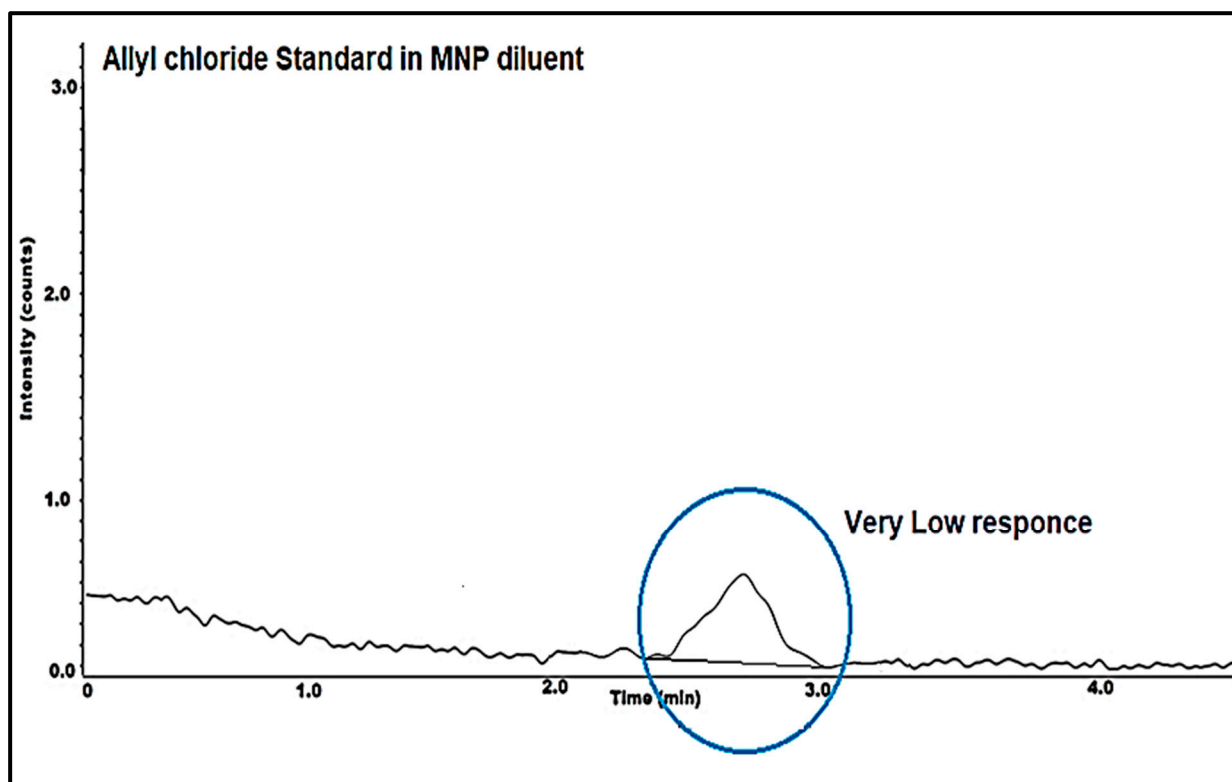

**Figure S17.** MS/MS chromatograms of Allyl chloride standard poor response and improper peak in Method optimization with different diluents study.
